# Supplementary material
Source: MDPI journal article supplement (https://www.mdpi.com/2311-5637/9/12/1026)
Supplement: s1 [file s1]

**Title: New insights into the biosynthesis of succinic acid by *Actinobacillus succinogenes* with the help of its engineered strains**

Authors: Chunmei Chen, Pu Zheng\*

The Key Laboratory of Industrial Biotechnology, Ministry of Education, School of Biotechnology,  
Jiangnan University, Wuxi 214122, China.

\*Corresponding author: Pu Zheng

Tel./ fax: +86 510 8591 8156.

E-mail address: zhengpu@jiangnan.edu.cn.

Table S1 The strains and plasmids used in this study.

Table S2 The primers used in this study.

Table S3 The PAM sequences used in this study.

Table S1 The strains and plasmids used in this study

| Strains and plasmids             | Description                                                                                 | Reference or source |
|----------------------------------|---------------------------------------------------------------------------------------------|---------------------|
| <b>Strains</b>                   |                                                                                             |                     |
| JM109                            | <i>E. coli</i> , cloning strain                                                             | Our laboratory      |
| <i>A. succinogenes</i> M 2012036 | <i>A. succinogenes</i> , wild type                                                          | Our laboratory      |
| $\Delta$ ackA                    | <i>A. succinogenes</i> derivative, contains <i>ackA</i> knockout                            | Reference 30        |
| $\Delta$ ackA:: <i>ackA</i>      | $\Delta$ ackA derivative, contains <i>ackA</i> from <i>A. succinogenes</i>                  | This study          |
| $\Delta$ ackA:: <i>ppk</i>       | $\Delta$ ackA derivative, contains <i>ppk</i> from <i>Pseudomonas aeruginosa</i>            | This study          |
| $\Delta$ ackA:: <i>pyc</i>       | $\Delta$ ackA derivative, contains <i>pyc</i> from <i>Corynebacterium acetoacetophilus</i>  | This study          |
| $\Delta$ ackA:: <i>pepc</i>      | $\Delta$ ackA derivative, contains <i>pepc</i> from <i>Corynebacterium acetoacetophilus</i> | This study          |
| $\Delta$ Asuc_0914               | <i>A. succinogenes</i> derivative, contains <i>Asuc_0914</i> knockout                       | This study          |
| $\Delta$ Asuc_0023               | <i>A. succinogenes</i> derivative, contains <i>Asuc_0023</i> knockout                       | This study          |
| $\Delta$ Asuc_0715               | <i>A. succinogenes</i> derivative, contains <i>Asuc_0715</i> knockout                       | This study          |
| $\Delta$ Asuc_0716               | <i>A. succinogenes</i> derivative, contains <i>Asuc_0716</i> knockout                       | This study          |
| $\Delta$ Asuc_0750               | <i>A. succinogenes</i> derivative, contains <i>Asuc_0750</i> knockout                       | This study          |
| $\Delta$ Asuc_2056               | <i>A. succinogenes</i> derivative, contains <i>Asuc_2056</i> knockout                       | This study          |
| $\Delta$ Asuc_0715-0716          | <i>A. succinogenes</i> derivative, contains <i>Asuc_0715</i> and <i>Asuc_0716</i> knockout  | This study          |
| <b>Plasmids</b>                  |                                                                                             |                     |
| <b>Td-CBE</b>                    | the cytosine base editor                                                                    | Data unpublished    |
| 1034-Td-CBE                      | Td-CBE derivative, contains gRNA expression cassette targeting <i>Asuc_1034</i>             | This study          |
| 0914-Td-CBE                      | Td-CBE derivative, contains gRNA expression cassette targeting <i>Asuc_0914</i>             | This study          |
| 0301-Td-CBE                      | Td-CBE derivative, contains gRNA expression cassette targeting <i>Asuc_0301</i>             | This study          |
| 0302-Td-CBE                      | Td-CBE derivative, contains gRNA expression cassette targeting <i>Asuc_0302</i>             | This study          |
| 0715-Td-CBE                      | Td-CBE derivative, contains gRNA expression cassette targeting <i>Asuc_0715</i>             | This study          |
| 0716-Td-CBE                      | Td-CBE derivative, contains gRNA expression                                                 | This study          |

---

|             |                                                                                 |            |
|-------------|---------------------------------------------------------------------------------|------------|
|             | cassette targeting <i>Asuc_0716</i>                                             |            |
| 0023-Td-CBE | Td-CBE derivative, contains gRNA expression cassette targeting <i>Asuc_0023</i> | This study |
| 0750-Td-CBE | Td-CBE derivative, contains gRNA expression cassette targeting <i>Asuc_0750</i> | This study |
| 2056-Td-CBE | Td-CBE derivative, contains gRNA expression cassette targeting <i>Asuc_2056</i> | This study |

---

Table S2 The primers used in this study

| Primers      | Sequence (5' to 3')                                  |
|--------------|------------------------------------------------------|
| Pyc-F        | ttatcaatgaggtgatctagaGTGTCGACTCACACATC<br>TTCAACG    |
| Pyc-R        | acggccagtgaattcgagctcTTAGGAAACGACGACG<br>ATCAAGT     |
| Pepc-F       | ttatcaatgaggtgatctagaatgactgatttttacgga              |
| Pepc-R       | acggccagtgaattcgagctcctagccggagtgcgcagc              |
| Ppk-F        | ttatcaatgaggtgatctagaatgttcgaatccgcggaagttggcca<br>c |
| Ppk-R        | acggccagtgaattcgagctccagcggcgcggtgcggct              |
| ackA-F       | ttatcaatgaggtgatctaga atgtccaaattagtttta             |
| ackA-R       | acggccagtgaattcgagctc ttagaacaagacgggcg              |
| CBfdh-F      | ttatcaatgaggtgatctagaATGAAAATTGTGCTGGT<br>GCTGTA     |
| CBfdh-R      | acggccagtgaattcgagctcTTATTTCTTATCATGTTT<br>GCCATAGGC |
| DVfdh-F      | ttatcaatgaggtgatctagaATGACCGTGACCCGTCG<br>TCA        |
| DVfdh-R      | acggccagtgaattcgagctcTTACGCACGCGGACGG<br>AATA        |
| 0914-td-sg-F | cgacaggttattgataaactGTTTTAGAGCTAGAAATAG<br>CAAG      |
| 0914-td-sg-R | agtttatcaataacctgtcggatattttctccaataaaaagt           |
| 1034-td-sg-F | ggatccgcaaacggcgattcGTTTTAGAGCTAGAAATA<br>GCAAG      |
| 1034-td-sg-R | gaatcgccgtttgcggatccgatattttctccaataaaaagt           |
| 0023-td-sg-F | tgctcagtcctaaacttaaccGTTTTAGAGCTAGAAATAG<br>CAAG     |
| 0023-td-sg-R | ggttaagtttgactgagcagatattttctccaataaaaagt            |
| 0715-td-sg-F | attgtgcaaatcaattcttaGTTTTAGAGCTAGAAATAGC<br>AAG      |
| 0715-td-sg-R | taagaattgattgcacaatgatattttctccaataaaaagt            |
| 0716-td-sg-F | catgcagttgcagcacgggcGTTTTAGAGCTAGAAATA<br>GCAAG      |
| 0716-td-sg-R | gcccgtgctgcaactgcatggatattttctccaataaaaagt           |
| 0301-td-sg-F | ctaccgcaagcggcatctatGTTTTAGAGCTAGAAATAG<br>CAAG      |
| 0301-td-sg-R | atagatgccgcttgcggtaggatattttctccaataaaaagt           |
| 2056-td-sg-F | tatccaatctcaccatacgtGTTTTAGAGCTAGAAATAG<br>CAAG      |
| 2056-td-sg-R | acgtatggtgagattggatagatattttctccaataaaaagt           |

---

|               |                                                 |
|---------------|-------------------------------------------------|
| 0750-td-sg-F  | ctggcaagtcggcgtattggGTTTTAGAGCTAGAAATAG<br>CAAG |
| 0750-td-sg-R  | ccaatacgccgacttgccagatatttttccaataaaaagt        |
| 0302-td-sg-F  | attacaagcagtgaaaaaacGTTTTAGAGCTAGAAATAG<br>CAAG |
| 0302-td-sg-R  | gttttttactgcttgtaatgatattttccaataaaaagt         |
| 0914-cexu-F   | atggatttcccgaattg                               |
| 0914-cexu-R   | aggcgcatggcgaaagta                              |
| 1575-cexu-F   | atgacaacgggcagtttac                             |
| 1575-cexu-R   | actacggccgataaataga                             |
| 0023-cexu-F   | atgtccgatattgcagtaa                             |
| 0023-cexu-R   | caaatcccgaaggatacg                              |
| 0715-cecu-F   | gcctgcatgggtattgtact                            |
| 0715-cecu-R   | gacgatagaataacagacga                            |
| 0716-cexu-F   | ggcttgaatatgcaggtga                             |
| 0716-cexu-R   | agtacaatacccatgcagg                             |
| 0292-cexu-F   | tacatgaaatgccggatgt                             |
| 0292-cexu-R   | ccgaattatcgctttcttc                             |
| 0301-2-cexu-F | accgcaccgatggcgggcaa                            |
| 0301-2-cexu-R | acatggtttcaagctggtt                             |
| 0750-cexu-F   | atgccaaataagtaaataag                            |
| 0750-cexu-R   | gactttcgccgtcgcccggt                            |
| 2056-cexu-F   | tagcccgatgtccgcttate                            |
| 2056-cexu-R   | ccgacagacaaacggccgtc                            |

---

Table S3 The PAM sequences used in this study

| 序列 (5'→3')           | PAM | 目的                         |
|----------------------|-----|----------------------------|
| cgacaggttattgataaact | CGG | Targeting <i>Asuc_0914</i> |
| ccagcttgaaccatgtcaa  | TGG | Targeting <i>Asuc_0301</i> |
| attacaagcagtgaaaaaac | AGG | Targeting <i>Asuc_0302</i> |
| ttacggagaacaatgatgac | GGG | Targeting <i>Asuc_0716</i> |
| tgctcagtccaaacttaacc | AGG | Targeting <i>Asuc_0023</i> |
| attgtgcaaatcaattctta | CGG | Targeting <i>Asuc_0715</i> |
